# Supplementary material for: Phase-pure BiFeO3 produced by reaction flash-sintering of Bi2O3 and Fe2O3
Source: Royal Society of Chemistry journal article supplement (doi:10.1039/c7ta09239c), 2017-12-22
Supplement: c7ta09239c2.pdf [file c7ta09239c2.pdf]

## Supplementary Information

### PHASE-PURE BiFeO<sub>3</sub> PRODUCED by REACTION FLASH-SINTERING of Bi<sub>2</sub>O<sub>3</sub> and Fe<sub>2</sub>O<sub>3</sub>

Eva Gil-González,<sup>a</sup> Antonio Perejón,<sup>a,b</sup> Pedro E. Sánchez-Jiménez,<sup>a</sup> María J. Sayagués,<sup>a</sup> Rishi Raj,<sup>c</sup> Luis A. Pérez-Maqueda<sup>a,\*</sup>

<sup>a</sup>*Instituto de Ciencia de Materiales de Sevilla (C.S.I.C.-Univ. Sevilla). C. Américo Vespucio 49, Sevilla 41092. Spain*

<sup>b</sup>*Departamento de Química Inorgánica, Facultad de Química, Universidad de Sevilla, Sevilla 41071, Spain*

<sup>c</sup>*Materials Science and Engineering Program, Department of Mechanical Engineering, University of Colorado at Boulder, Boulder, CO 80309-0427, USA*

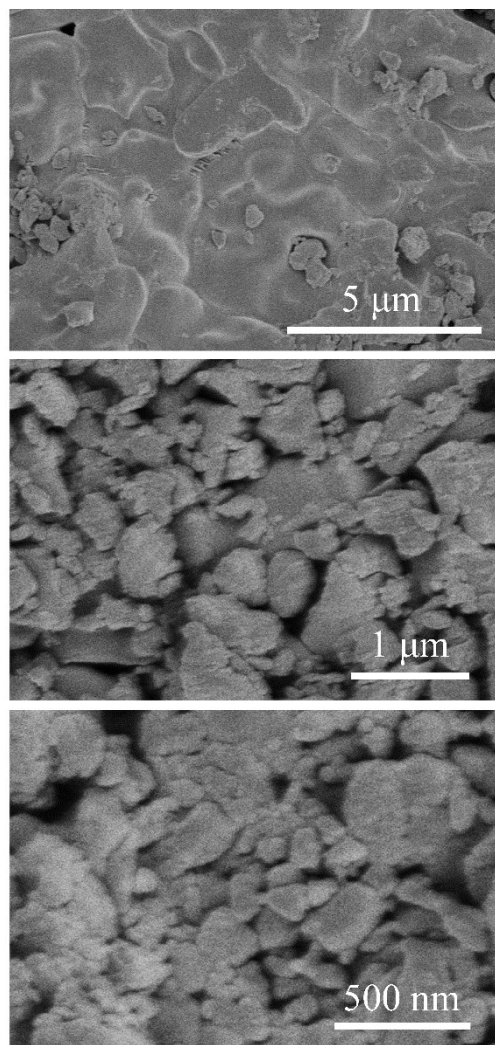

**Figure S1.** SEM micrographs of different areas of the cross section of the sample synthesized by reaction flash sintering at 100 V cm<sup>-1</sup> and a current limit of 35 mA mm<sup>-2</sup>.

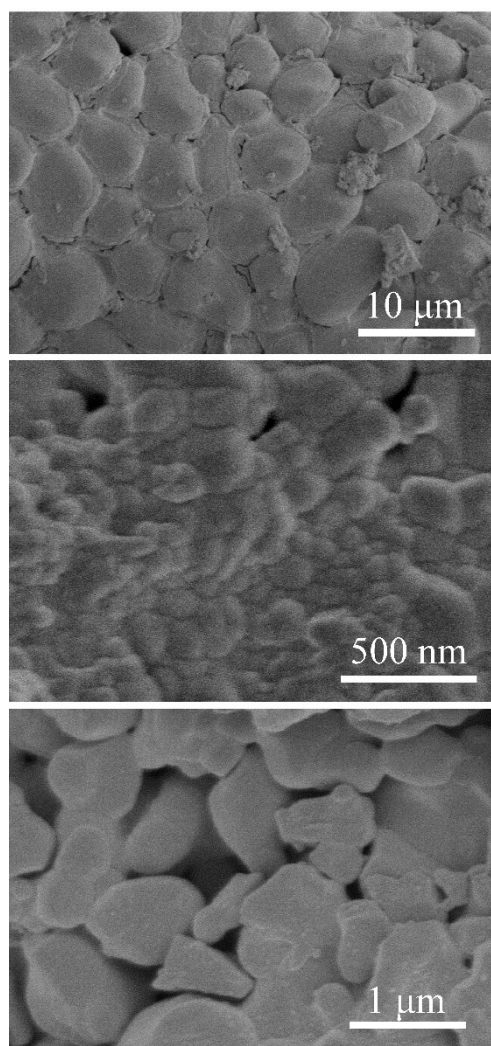

**Figure S2.** SEM micrographs of different areas of the cross section of the sample synthesized by reaction flash sintering at  $50 \text{ V cm}^{-1}$  and a current limit of  $50 \text{ mA mm}^{-2}$ .

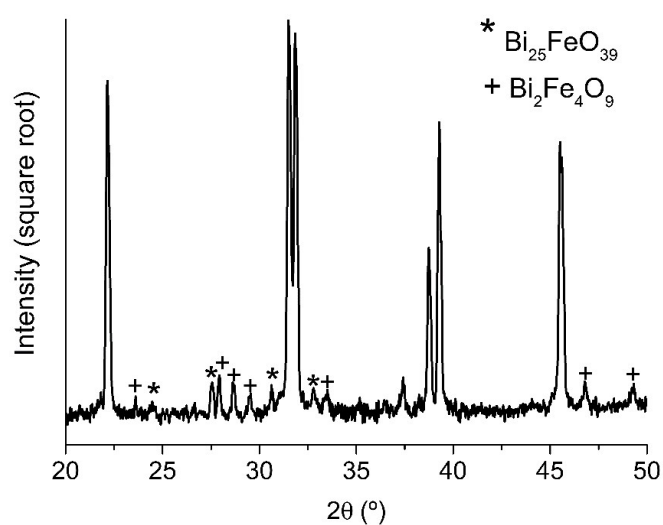

**Figure S3.** X-ray diffraction pattern of a  $\text{BiFeO}_3$  sample prepared by conventional solid-state reaction. The intensity is represented in square root in order to make the secondary phases more noticeable.

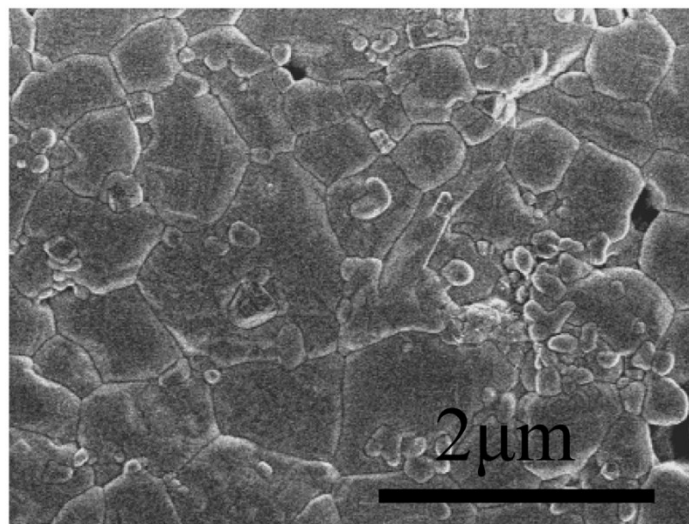

**Figure S4.** SEM micrograph of a BiFeO<sub>3</sub> sample prepared by conventional solid-state reaction.
